# Supplementary material for: Optimal Cutoff Titers for Indirect Immunofluorescence Assay for Diagnosis of Scrub Typhus
Source: PubMed Central journal article supplement (PMC4609688; doi:10.1128/jcm.01680-15), 2015-10-16
Supplement: JCM.01680-15_zjm999094589so1.pdf [file JCM.01680-15_zjm999094589so1.pdf]

### Text S1. The data set for Bayesian latent class models.

The following is the complete data set for Bayesian latent class model to estimate the accuracies of diagnostic tests for scrub typhus with conditional dependence between IFA IgM and PanBio IgM ICT. The first, second, third, fourth, and fifth columns are the results of *in vitro* isolation of *O. tsutsugamushi* (culture), a combination of PCR assays, STIC-based IFA IgM (positive when IFA IgM in admission sample was  $\geq 1:12,800$  and/or  $\geq 4$ -fold rise to  $\geq 1:200$  in convalescent sample compared to admission sample), PanBio IgM ICT and presence of eschar, respectively. 1= positive result and 0= negative result. Each row represents one independent participant. The sixth and seventh columns are the highest IgM titres detected by IFA IgM in admission and convalescent sample, respectively. The raw data on IgM titres were converted into binary data for each possible cutoff titre used in the model.

```
# Data
list(y=structure(
  .Data=c(
    0, 1, 1, 1, 1, 400, 25600,
    0, 0, 0, 0, 0, 50, 50,
    0, 0, 1, 1, 1, 25600, 25600,
    0, 0, 0, 1, 1, 3200, 3200,
    0, 0, 1, 1, 1, 25600, 25600,
    0, 0, 0, 0, 0, 50, NA,
    0, 0, 1, 1, 0, 25600, 25600,
    1, 1, 1, 1, 1, 25600, NA,
    0, 0, 0, 0, 0, 100, 50,
    0, 0, 0, 0, 0, 50, 50,
    0, 0, 0, 1, 0, 3200, 3200,
    0, 0, 0, 1, 0, 800, 400,
    0, 1, 1, 1, 0, 12800, NA,
    1, 1, 1, 1, 1, 25600, 25600,
    0, 0, 0, 0, 0, 50, 100,
    0, 1, 0, 1, 0, 3200, 3200,
    0, 1, 0, 0, 0, 50, 50,
    0, 0, 0, 0, 0, 1600, 800,
    0, 0, 0, 0, 0, 100, NA,
    0, 0, 1, 0, 0, 50, 200,
    0, 0, 0, 0, 0, 100, 50,
    0, 0, 0, 0, 0, 100, 100,
    1, 0, 0, 0, 0, 50, 100,
    0, 0, 0, 0, 0, 50, 50,
    0, 0, 0, 0, 0, 50, 50,
    0, 0, 0, 0, 0, 50, 50,
    0, 0, 1, 0, 0, 100, 800,
    0, 0, 0, 0, 0, 50, 50,
    0, 0, 0, 0, 0, 50, NA,
    0, 0, 0, 0, 0, 50, 50,
    0, 1, 0, 1, 0, 3200, NA,
    0, 0, 0, 0, 0, 50, NA,
    0, 0, 0, 0, 0, 200, 50,
    0, 1, 1, 0, 0, 25600, 50,
    1, 1, 1, 1, 1, 25600, 1600,
    0, 0, 0, 0, 0, 50, 100,
    0, 1, 1, 0, 0, 25600, 25600,
    0, 0, 0, 0, 0, 50, 100,
    0, 0, 0, 0, 0, 100, 100,
    0, 0, 0, 0, 0, 100, 100,
    0, 0, 1, 1, 1, 12800, NA,
    0, 0, 0, 0, 0, 200, NA,
    0, 0, 0, 0, 0, 50, 50,
    0, 0, 1, 0, 0, 100, 400,
    0, 0, 0, 0, 0, 400, 200,
    0, 1, 0, 1, 1, 3200, NA,
    0, 0, 0, 0, 0, 50, 50,
    0, 0, 0, 0, 0, 200, 400,
    0, 0, 0, 0, 0, 200, 50,
    0, 0, 0, 0, 0, 200, 200,
    0, 0, 0, 0, 1, 50, 50,
    1, 0, 0, 0, 0, 50, 50,
```

|    |    |    |    |    |        |        |
|----|----|----|----|----|--------|--------|
| 0, | 0, | 1, | 1, | 0, | 12800, | NA,    |
| 0, | 0, | 0, | 0, | 0, | 50,    | 50,    |
| 0, | 0, | 0, | 0, | 0, | 50,    | 50,    |
| 1, | 1, | 1, | 1, | 1, | 25600, | 25600, |
| 0, | 0, | 0, | 0, | 0, | 100,   | NA,    |
| 0, | 0, | 0, | 0, | 0, | 50,    | 50,    |
| 0, | 0, | 0, | 0, | 0, | 50,    | 50,    |
| 0, | 0, | 0, | 0, | 0, | 50,    | 50,    |
| 0, | 0, | 0, | 0, | 0, | 200,   | 200,   |
| 0, | 0, | 0, | 0, | 0, | 100,   | 200,   |
| 0, | 0, | 0, | 0, | 0, | 800,   | 800,   |
| 0, | 0, | 0, | 0, | 0, | 50,    | NA,    |
| 0, | 0, | 0, | 0, | 0, | 50,    | 50,    |
| 0, | 0, | 0, | 0, | 0, | 50,    | 100,   |
| 0, | 0, | 0, | 0, | 0, | 50,    | NA,    |
| 0, | 0, | 0, | 0, | 0, | 200,   | 400,   |
| 0, | 0, | 0, | 0, | 0, | 100,   | 100,   |
| 0, | 1, | 1, | 1, | 0, | 25600, | 25600, |
| 0, | 0, | 0, | 0, | 0, | 50,    | 50,    |
| 0, | 0, | 0, | 0, | 0, | 100,   | NA,    |
| 0, | 0, | 0, | 0, | 0, | 100,   | 50,    |
| 0, | 1, | 1, | 1, | 0, | 100,   | 25600, |
| 0, | 0, | 0, | 0, | 0, | 50,    | 100,   |
| 0, | 0, | 0, | 0, | 0, | 50,    | 50,    |
| 0, | 0, | 1, | 0, | 0, | 800,   | 800,   |
| 0, | 0, | 1, | 0, | 0, | 400,   | 12800, |
| 0, | 0, | 0, | 0, | 0, | 200,   | 200,   |
| 0, | 1, | 1, | 1, | 0, | 25600, | 25600, |
| 0, | 0, | 0, | 0, | 0, | 100,   | 100,   |
| 0, | 0, | 0, | 0, | 0, | 50,    | NA,    |
| 0, | 1, | 0, | 0, | 0, | 50,    | 50,    |
| 0, | 0, | 0, | 0, | 0, | 50,    | 50,    |
| 0, | 0, | 0, | 0, | 0, | 100,   | 200,   |
| 0, | 0, | 1, | 0, | 0, | 100,   | 400,   |
| 0, | 0, | 0, | 0, | 0, | 50,    | NA,    |
| 0, | 0, | 0, | 0, | 0, | 400,   | 200,   |
| 0, | 0, | 0, | 0, | 0, | 50,    | 100,   |
| 0, | 0, | 1, | 0, | 0, | 50,    | 200,   |
| 0, | 0, | 0, | 0, | 0, | 50,    | NA,    |
| 0, | 0, | 0, | 0, | 0, | 50,    | 50,    |
| 0, | 1, | 1, | 1, | 1, | 25600, | 25600, |
| 0, | 0, | 1, | 1, | 0, | 25600, | 25600, |
| 0, | 0, | 1, | 0, | 0, | 100,   | 400,   |
| 0, | 0, | 0, | 0, | 0, | 400,   | 400,   |
| 0, | 0, | 0, | 0, | 0, | 50,    | 50,    |
| 0, | 0, | 0, | 0, | 0, | 50,    | 50,    |
| 0, | 1, | 1, | 1, | 0, | 12800, | NA,    |
| 0, | 0, | 1, | 0, | 0, | 50,    | 400,   |
| 0, | 0, | 1, | 0, | 0, | 50,    | 400,   |
| 0, | 0, | 1, | 0, | 0, | 50,    | 200,   |
| 0, | 0, | 0, | 0, | 0, | 50,    | 100,   |
| 0, | 1, | 1, | 0, | 0, | 400,   | 1600,  |
| 0, | 0, | 0, | 0, | 0, | 50,    | NA,    |
| 0, | 0, | 1, | 0, | 0, | 50,    | 200,   |
| 0, | 0, | 1, | 0, | 0, | 200,   | 800,   |
| 0, | 0, | 0, | 0, | 0, | 50,    | 50,    |
| 0, | 0, | 1, | 0, | 0, | 50,    | 800,   |
| 0, | 0, | 0, | 0, | 0, | 100,   | 100,   |
| 0, | 1, | 0, | 0, | 0, | 50,    | 50,    |
| 0, | 0, | 0, | 0, | 0, | 50,    | 50,    |
| 1, | 1, | 1, | 0, | 0, | 200,   | 25600, |
| 0, | 0, | 0, | 0, | 0, | 50,    | 50,    |
| 0, | 0, | 0, | 0, | 0, | 100,   | 200,   |
| 0, | 0, | 0, | 0, | 0, | 50,    | NA,    |
| 0, | 0, | 0, | 0, | 0, | 50,    | 100,   |
| 0, | 0, | 0, | 0, | 0, | 100,   | 100,   |
| 0, | 0, | 0, | 0, | 0, | 100,   | 50,    |
| 0, | 0, | 0, | 0, | 0, | 50,    | 50,    |
| 0, | 0, | 1, | 0, | 0, | 50,    | 800,   |
| 0, | 0, | 1, | 0, | 0, | 50,    | 1600,  |
| 0, | 0, | 1, | 0, | 0, | 100,   | 400,   |
| 0, | 1, | 1, | 1, | 1, | 3200,  | 25600, |
| 0, | 0, | 0, | 0, | 0, | 50,    | 50,    |
| 0, | 0, | 0, | 0, | 0, | 50,    | NA,    |
| 0, | 0, | 0, | 0, | 0, | 50,    | 50,    |
| 0, | 0, | 0, | 0, | 0, | 200,   | 400,   |
| 0, | 0, | 0, | 0, | 0, | 50,    | 50,    |
| 0, | 0, | 0, | 0, | 0, | 50,    | 50,    |

```

0,      0,      0,      0,      0,      50,      50,
0,      0,      0,      0,      0,      200,      100,
0,      0,      0,      0,      0,      200,      200,
1,      1,      1,      1,      0,      25600,      25600,
1,      0,      0,      0,      0,      800,      800,
0,      0,      0,      0,      0,      50,      50,
0,      0,      0,      0,      0,      200,      200,
0,      1,      1,      1,      1,      800,      25600,
0,      0,      0,      0,      0,      50,      50,
0,      0,      0,      0,      0,      200,      50,
0,      0,      0,      0,      0,      50,      50,
0,      0,      0,      0,      0,      50,      50,
0,      0,      1,      0,      0,      50,      200,
0,      0,      1,      0,      0,      50,      800,
0,      0,      0,      0,      0,      50,      50,
0,      1,      1,      1,      1,      12800,      3200,
0,      1,      1,      1,      0,      6400,      25600,
0,      1,      1,      1,      1,      25600,      25600,
0,      0,      0,      0,      0,      50,      50,
0,      0,      0,      0,      1,      100,      100,
0,      0,      0,      0,      0,      50,      50,
0,      0,      1,      0,      0,      50,      200,
0,      0,      0,      0,      0,      50,      50,
0,      0,      0,      0,      0,      200,      NA,
0,      0,      0,      1,      0,      400,      100,
0,      0,      0,      0,      0,      50,      50,
0,      0,      0,      0,      0,      50,      50,
0,      0,      0,      1,      0,      400,      800,
0,      0,      0,      0,      0,      50,      50
),.Dim=c(161,5)),
pattern=structure(
.Data=c(
1,      1,      1,      1,      1,
1,      1,      1,      1,      0,
1,      1,      1,      0,      1,
1,      1,      0,      1,      1,
1,      0,      1,      1,      1,
0,      1,      1,      1,      1,
1,      1,      1,      0,      0,
1,      1,      0,      1,      0,
1,      0,      1,      1,      0,
0,      1,      1,      0,      1,
1,      0,      1,      0,      1,
0,      1,      1,      0,      1,
1,      0,      0,      1,      1,
0,      0,      1,      1,      1,
1,      1,      0,      0,      0,
1,      0,      1,      0,      0,
1,      0,      0,      0,      1,
0,      1,      1,      0,      0,
0,      1,      0,      1,      0,
0,      0,      1,      1,      0,
0,      0,      1,      0,      1,
1,      0,      0,      1,      1,
0,      1,      0,      0,      0,
0,      0,      0,      1,      1,
0,      0,      0,      0,      0,
0,      1,      0,      0,      0,
0,      0,      1,      0,      0,
0,      0,      0,      1,      0,
0,      0,      0,      0,      1,
0,      0,      0,      0,      0
),.Dim=c(32,5)))

```





```

0,      1,      1,      1,      1,
0,      0,      0,      0,      0,
0,      0,      0,      0,      0,
0,      0,      0,      0,      0,
0,      0,      0,      0,      0,
0,      0,      0,      0,      0,
0,      0,      0,      0,      0,
0,      0,      0,      0,      0,
0,      1,      1,      1,      1,
0,      1,      1,      1,      0,
0,      1,      1,      1,      1,
0,      0,      0,      0,      0,
0,      0,      0,      0,      1,
0,      0,      0,      0,      0,
0,      0,      0,      0,      0,
0,      0,      0,      0,      0,
0,      0,      0,      0,      0,
0,      0,      0,      1,      0,
0,      0,      0,      0,      0,
0,      0,      0,      0,      0,
0,      0,      0,      1,      0,
0,      0,      0,      0,      0
),.Dim=c(161,5)),
pattern=structure(
.Data=c(
1,      1,      1,      1,      1,
1,      1,      1,      1,      0,
1,      1,      1,      0,      1,
1,      1,      0,      1,      1,
1,      0,      1,      1,      1,
0,      1,      1,      1,      1,
1,      1,      1,      0,      0,
1,      1,      0,      1,      0,
0,      1,      1,      1,      0,
1,      1,      0,      0,      1,
1,      0,      1,      0,      1,
0,      1,      1,      0,      1,
0,      0,      1,      1,      1,
1,      1,      0,      0,      0,
1,      0,      1,      0,      0,
1,      0,      0,      1,      1,
0,      1,      1,      0,      0,
0,      1,      0,      1,      0,
0,      0,      1,      1,      0,
0,      0,      1,      0,      1,
0,      0,      0,      1,      1,
1,      0,      0,      0,      0,
0,      1,      0,      0,      0,
0,      0,      1,      0,      0,
0,      0,      0,      1,      0,
0,      0,      0,      0,      1,
0,      0,      0,      0,      0
),.Dim=c(32,5))

```
