# Supplementary material for: Optimal Cutoff Titers for Indirect Immunofluorescence Assay for Diagnosis of Scrub Typhus
Source: PubMed Central journal article supplement (PMC4609688; doi:10.1128/jcm.01680-15), 2015-10-16
Supplement: JCM.01680-15_zjm999094589so2.pdf [file JCM.01680-15_zjm999094589so2.pdf]

## Text S2. WinBUGS models.

The following is the WinBUGS codes for Bayesian latent-class model with conditional dependence between results of IFA IgM and PanBio IgM ICT. The same model structure is applied to each and every dataset created

```
model{

for (i in 1:161){
  status[i]~dbern(prev)

##### Likelihood #####
for (j in 1:5){
  y[i,j]~dbern(p[i,j])
  ypred[i,j]~dbern(p[i,j])
}
}

for (i in 1:161){
for (j in 1:2){
  logit(p[i,j])<-status[i]*alpha[j]+(1-status[i])*beta[j]
}
for (j in 3:4){
  logit(p[i,j])<-status[i]*alpha[j]+(1-status[i])*beta[j]+status[i]*re[i]*IgM
  logit(pstatus[i,j])<-status[i]*alpha[j]+status[i]*re[i]*IgM+(1-status[i])*(-1000)
}
  logit(p[i,5])<-status[i]*alpha[5]+(1-status[i])*beta[5]
  re[i]~dnorm(0,1)
}

##### Prior #####
prev~dbeta(0.5,0.5)
IgM~dnorm(0.0,0.1)I(0,6)
alpha[1]~dnorm(0.0,0.1)
  logit(s[1])<-alpha[1]
beta[1]<--1000
for (j in 2:5){
  alpha[j]~dnorm(0.0,0.1)
  beta[j]~dnorm(0.0,0.1)I(,1)
  logit(s[j])<-alpha[j]
  logit(x[j])<--beta[j]
}
se[1]<-s[1]
se[2]<-s[2]
se[5]<-s[5]
for (j in 3:4){
  se[j]<-sum(pstatus[,j])/sum(status[])
}

#### Unbiased estimation of sensitivity, specificity and accuracy ####
for (i in 1:161){
for (j in 1:5){
  diseasetestpos[i,j]<-status[i]*y[i,j]
  nondiseasetestneg[i,j]<-(1-status[i])*(1-y[i,j])
}
}
for (j in 1:5){
  sen[j]<-sum(diseasetestpos[,j])/sum(status[])
  spec[j]<-sum(nondiseasetestneg[,j])/(161-sum(status[]))
}

for (j in 1:5){
accuracy[j]<-(sum(diseasetestpos[,j])+ sum(nondiseasetestneg[,j]))/161
}

##### Prediction #####
for (i in 1:161){
for (k in 1:32){
for (j in 1:5){
  arraymatched[i,k,j]<-equals(ypred[i,j],pattern[k,j])
}
  nmatched[i,k]<-sum(arraymatched[i,k,])
  matchedpattern[i,k]<-equals(nmatched[i,k],5)
}
}
}
```

```

for (k in 1:32){
  freqpred[k]<-sum(matchedpattern[,k])
}

##### Bayesian p value #####
for (i in 1:161){
  for (k in 1:32){
    for (j in 1:5){
      arraymatchedobs[i,k,j]<-equals(y[i,j],pattern[k,j])
    }
    nmatchedobs[i,k]<-sum(arraymatchedobs[i,k,])
    matchedpatternobs[i,k]<-equals(nmatchedobs[i,k],5)
  }
}
for (k in 1:32){
  freqobs[k]<-sum(matchedpatternobs[,k])
}
for (k in 1:32){
  pvalue[k]<-step(freqpred[k]-freqobs[k])
}
}

```
